**Alan Jay Schwartz, M.D., M.S.Ed.,** Department of Anesthesiology and Critical Care Medicine, Children's Hospital of Philadelphia, University of Pennsylvania School of Medicine, Philadelphia, Pennsylvania. [schwartzaj@email.chop.edu](mailto:schwartzaj@email.chop.edu)

## References

1. Brotherton SE, Etzel SI: Graduate Medical Education, 2008–2009. *JAMA* 2009; 302:1357–72
2. Barzansky B, Etzel SI: Medical schools in the United States, 2008–2009. *JAMA* 2009; 302:1349–55
3. Barzansky B, Etzel SI: Medical schools in the United States, 2007–2008. *JAMA* 2008; 300:1221–7
4. Schwartz AJ: Teaching anesthesia, Miller's Anesthesia. Edited by Miller RD. Philadelphia, Churchill Livingstone Elsevier, 2010, pp193–207
5. Knowles M: The Adult Learner: A Neglected Species. Houston, Gulf Publishing, 1978
6. Jason H, Westberg J: Teachers and Teaching in US Medical Schools. East Norwalk, CT, Appleton & Lange, 1982
7. Foley RP, Smilansky J: Teaching Techniques. A Handbook for Health Professionals. New York, McGraw-Hill, 1980
8. Ratzan RM: On teachers. *N Engl J Med* 1982; 306:1420–2
9. Carroll L: Alice's Adventures in Wonderland and Through the Looking-Glass. New York, Barnes & Noble Classics, 2005

## ANESTHESIOLOGY REFLECTIONS

### The Final *Dental and Surgical Microcosm*

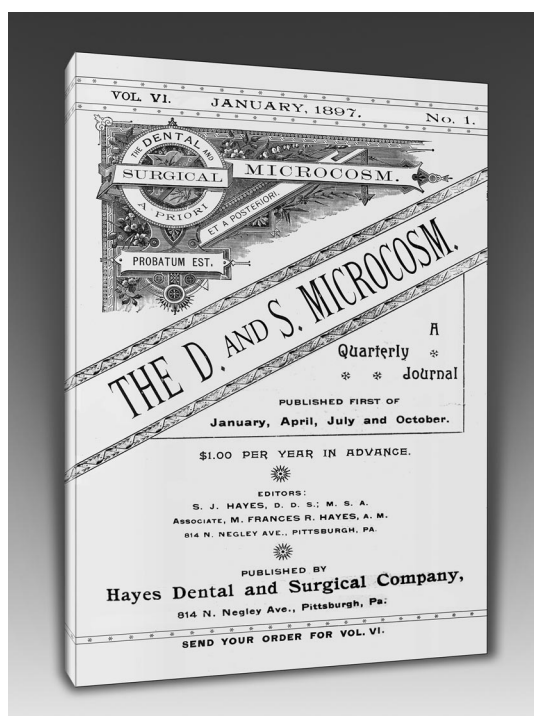

This month, January of 2010, marks the 113th anniversary of the final issue of *The Dental and Surgical Microcosm*, or *D&SM*. As it had been from 1891 to 1897, all issues of the *D&SM* had been indexed and subtitled as “A Quarterly Magazine, Devoted Chiefly to the Science of Anaesthesia and Anaesthetics.” During its 6.5-yr publication run, *D&SM* was never challenged about its claim of having been “the first and only journal in the world devoted chiefly to the science of Anaesthesia.” The world’s first anesthesia journal ceased publication when its proprietor and controlling editor expired in June of 1897. (Copyright © the American Society of Anesthesiologists, Inc. This image appears in color in the *Anesthesiology Reflections* online collection available at [www.anesthesiology.org](http://www.anesthesiology.org).)

George S. Bause, M.D., M.P.H., Honorary Curator, ASA’s Wood Library-Museum of Anesthesiology, Park Ridge, Illinois, and Clinical Associate Professor, Case Western Reserve University, Cleveland, Ohio. [UJYC@aol.com](mailto:UJYC@aol.com).
